# Supplementary material for: Encapsulation of a photosensitizer into cell membrane capsules for photodynamic therapy
Source: Royal Society of Chemistry journal article supplement (doi:10.1039/c6ra07480d), 2016-01-01
Supplement: c6ra07480d1.pdf [file c6ra07480d1.pdf]

**Encapsulation of Photosensitizer into Cell Membrane Capsules for Photodynamic Therapy**

Lijie Han<sup>1</sup>, Ying Chen<sup>1</sup>, Jie Niu<sup>2</sup>, Lihua Peng<sup>2</sup>, Zhengwei Mao<sup>1\*</sup>, Changyou Gao<sup>1</sup>

<sup>1</sup>*MOE Key Laboratory of Macromolecular Synthesis and Functionalization, Department of Polymer Science and Engineering, Zhejiang University, Hangzhou 310027, China*

<sup>2</sup>*Institute of Pharmaceutics, College of Pharmaceutical Sciences, Zhejiang University, Hangzhou, P.R.China*

\*Corresponding author.

Email: [zwmao@zju.edu.cn](mailto:zwmao@zju.edu.cn)

Fax: +86-571-87951108

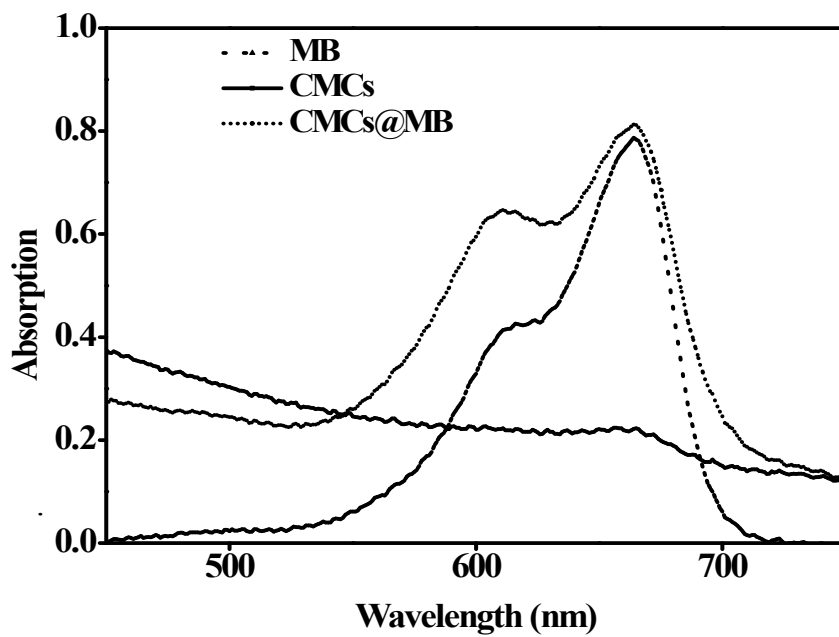

**Figure S1.** UV-Vis spectra of MB, CMCs and CMCs@MB, respectively.

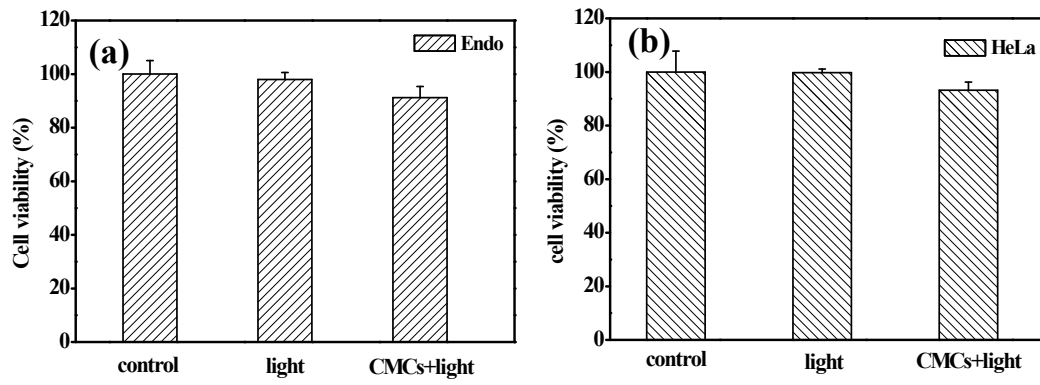

**Figure S2.** Viability of (a) endothelial cells and (b) HeLa cells incubated with 10 J/cm<sup>2</sup> irradiation and CMCs+10 J/cm<sup>2</sup> irradiation, respectively. Untreated cells in dark were used as control.
